# Supplementary material for: Examining the Eastern European extreme summer temperatures of 2023 from a long-term perspective: the role of natural variability vs. anthropogenic factors
Source: Copernicus journal article supplement (doi:10.5194/nhess-24-4683-2024), 2024-12-20
Supplement: Supplementary file 1 [file nhess-24-4683-2024-supplement.pdf]

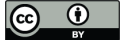

*Supplement of*

**Examining the Eastern European extreme summer temperatures of 2023 from a long-term perspective: the role of natural variability vs. anthropogenic factors**

**Monica Ionita et al.**

*Correspondence to:* Monica Ionita ([monica.ionita@awi.de](mailto:monica.ionita@awi.de))

The copyright of individual parts of the supplement might differ from the article licence.

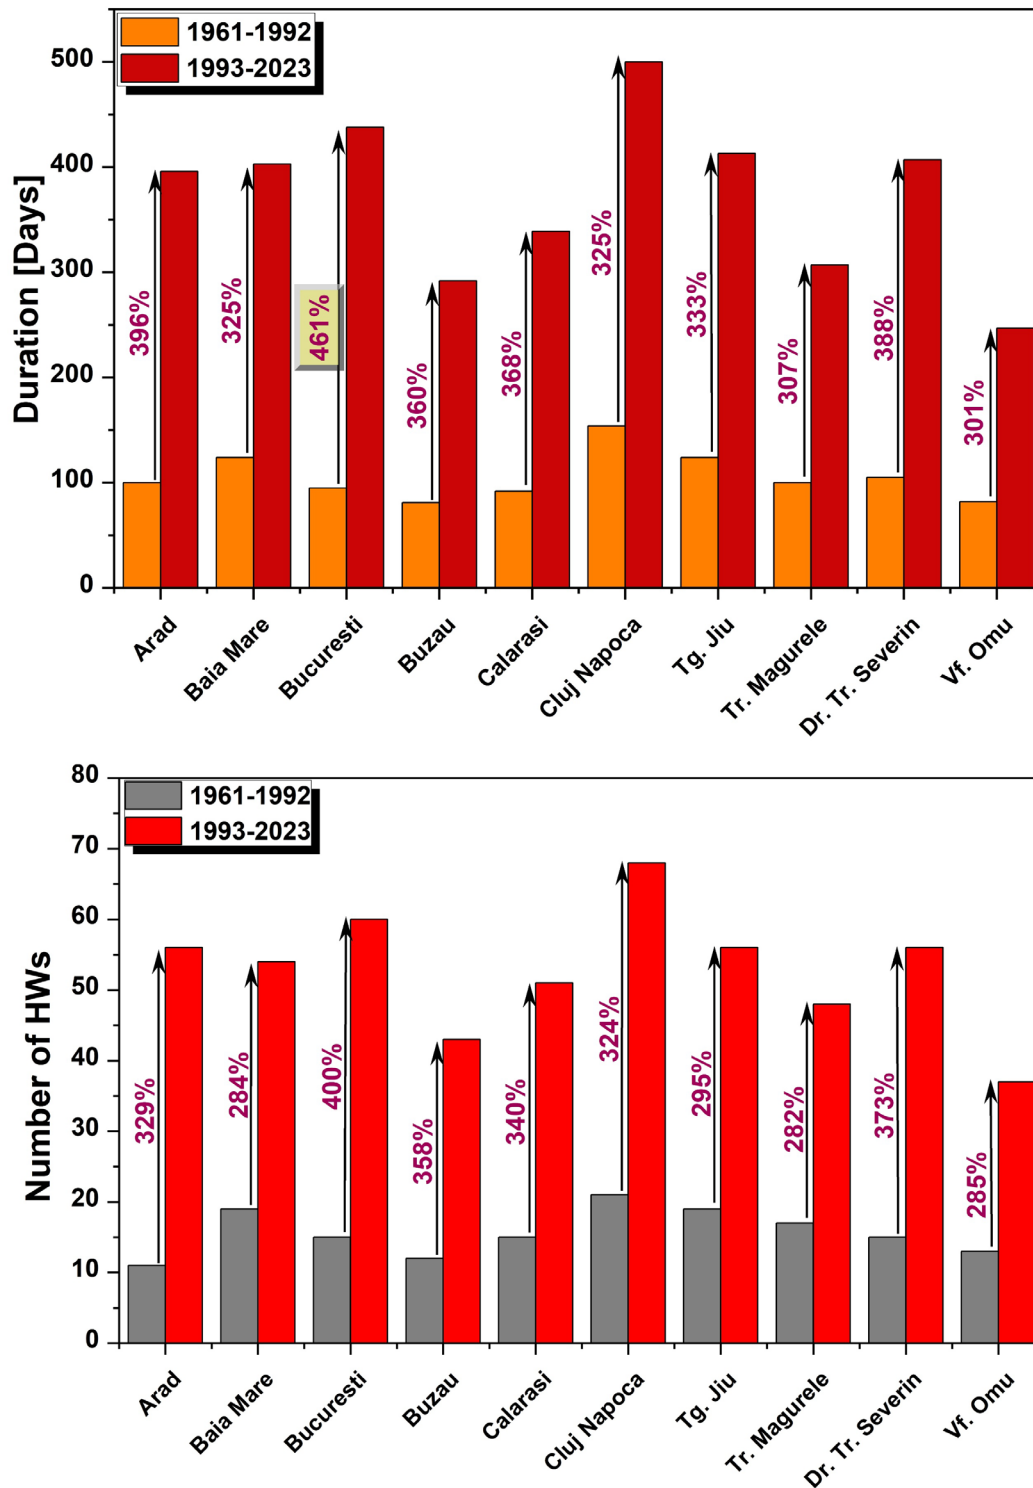

**Figure S1.** a) Distribution of the duration (i.e., sum of all days affected by a HW) over two periods, namely 1961 – 1992 (orange bars) and 1993 – 2023 (red bars), respectively and b) Distribution of the number of HWs (i.e., sum of all HWs) over two periods, namely 1961 – 1992 (gray bars) and 1993 – 2023 (red bars), respectively. The black arrows in a) and b) indicated the rate of change (as %) between the two analyzed periods.

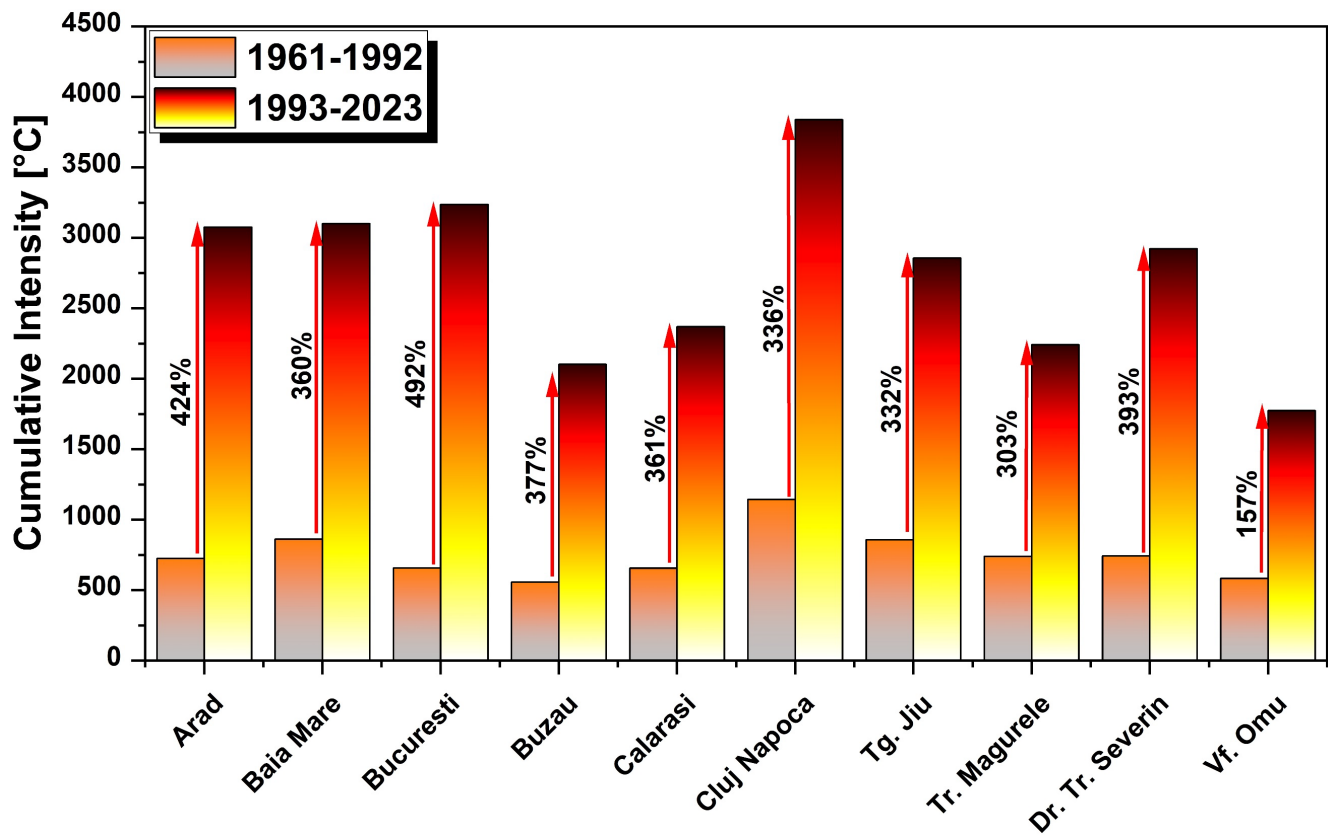

**Figure S2.** Distribution of the cumulative intensity (i.e., sum of daily maximum temperature anomaly over all days affected by a HW) over two periods, namely 1961 – 1992 (grey-to-orange bars) and 1993 – 2023 (yellow-to-red bars), respectively. The black arrows indicate the rate of change (as %) between the two analyzed periods. Yellow (grey) colors indicate smaller values, while red (orange) colors indicate higher values.

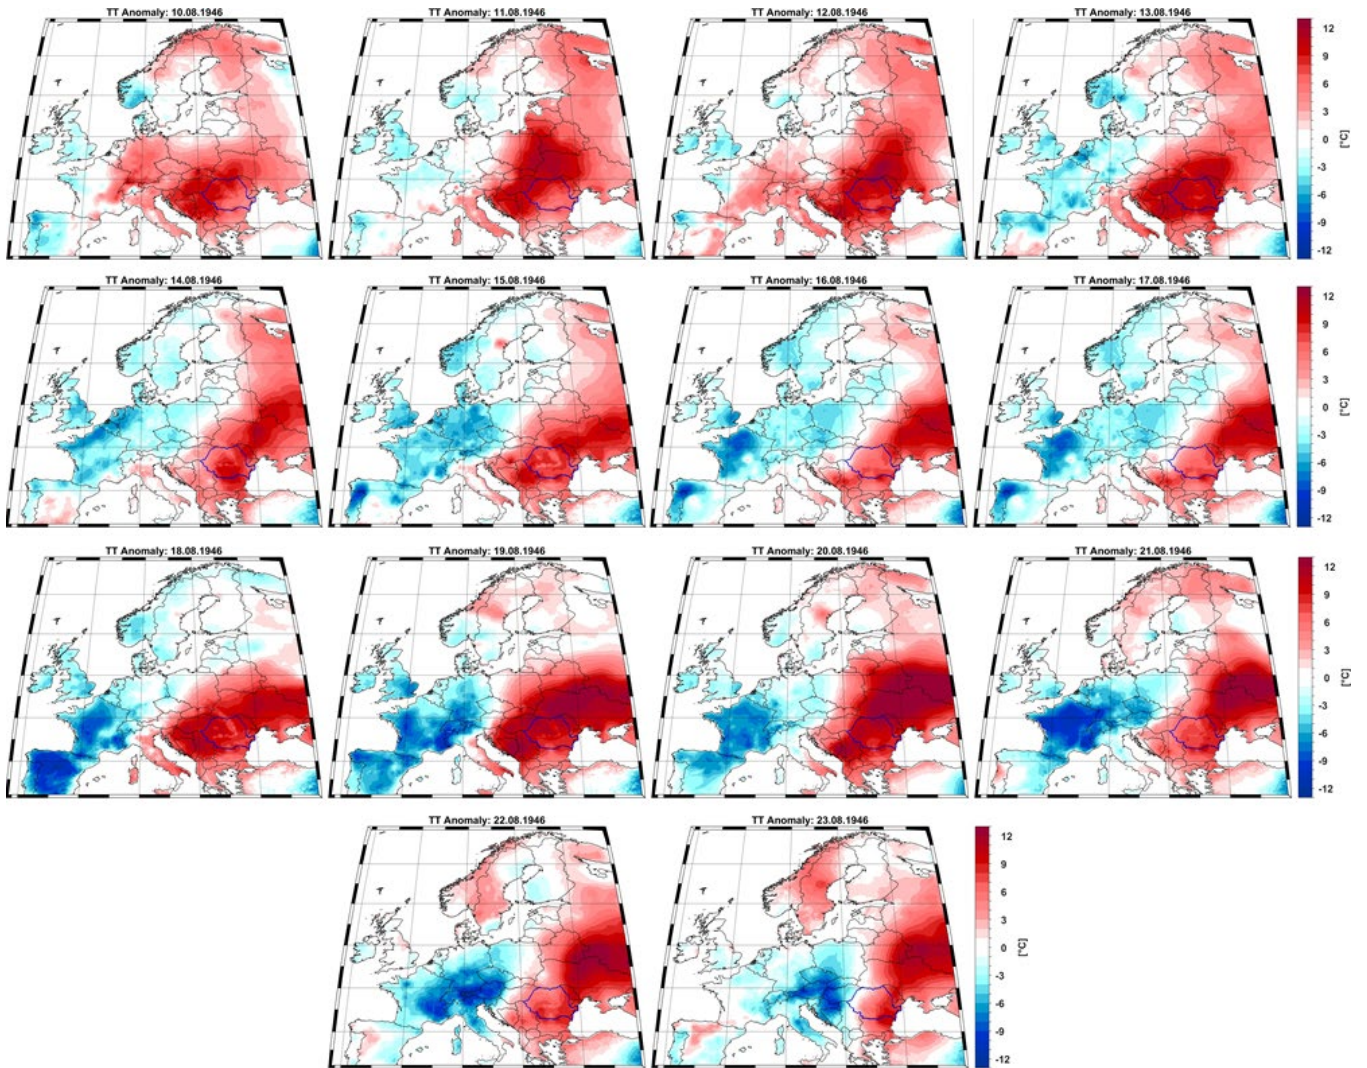

**Figure S3.** Spatial and temporal evolution of the daily maximum temperature anomaly over Europe over the period 10.08.1946 – 23.08.1946. The anomalies are computed relative to the climatological period 1971 – 2000.



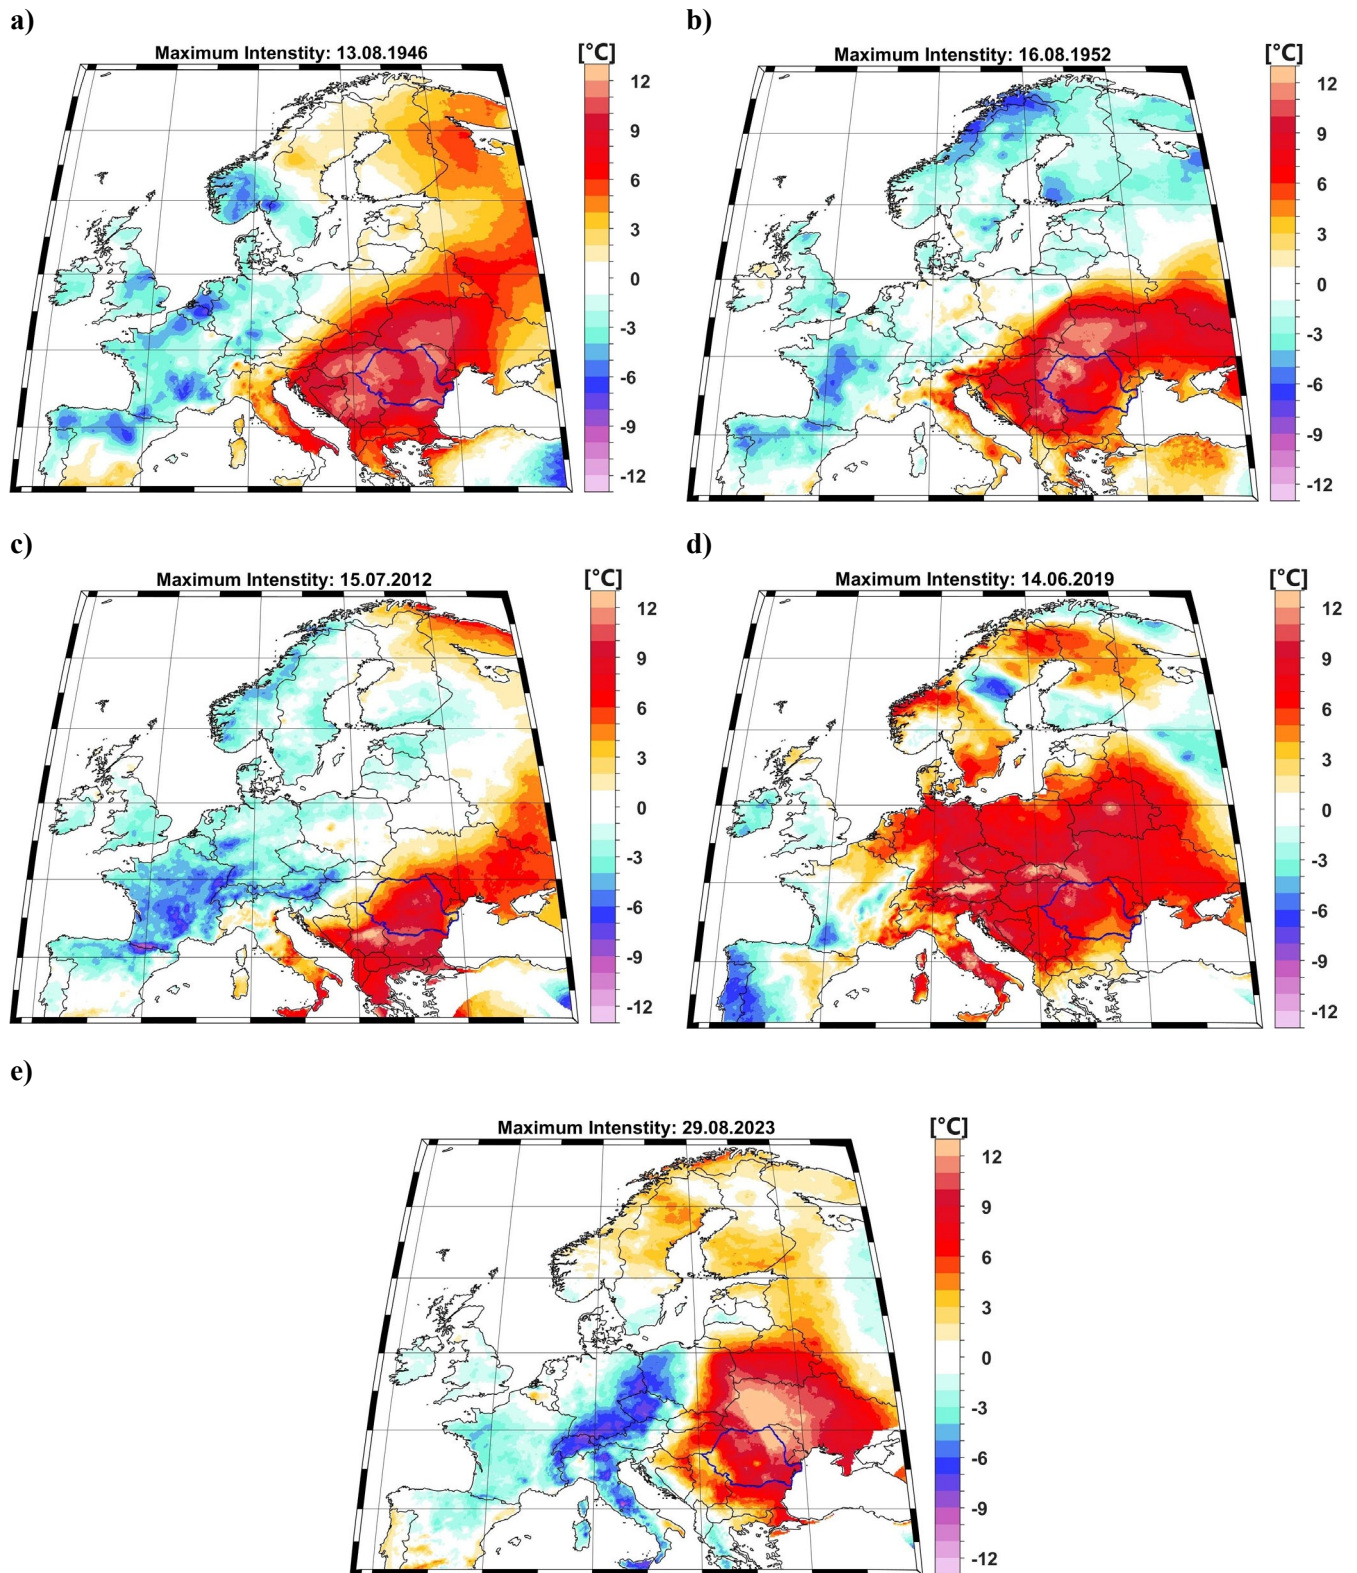

**Figure S4.** Daily maximum temperature anomaly on the day of the HW peak for different heatwave events: a) August 1946; c) August 1952; c) June/July 2012; d) June 2019 and e) August 2023. The anomalies are computed relative to the climatological period 1971 – 2000.

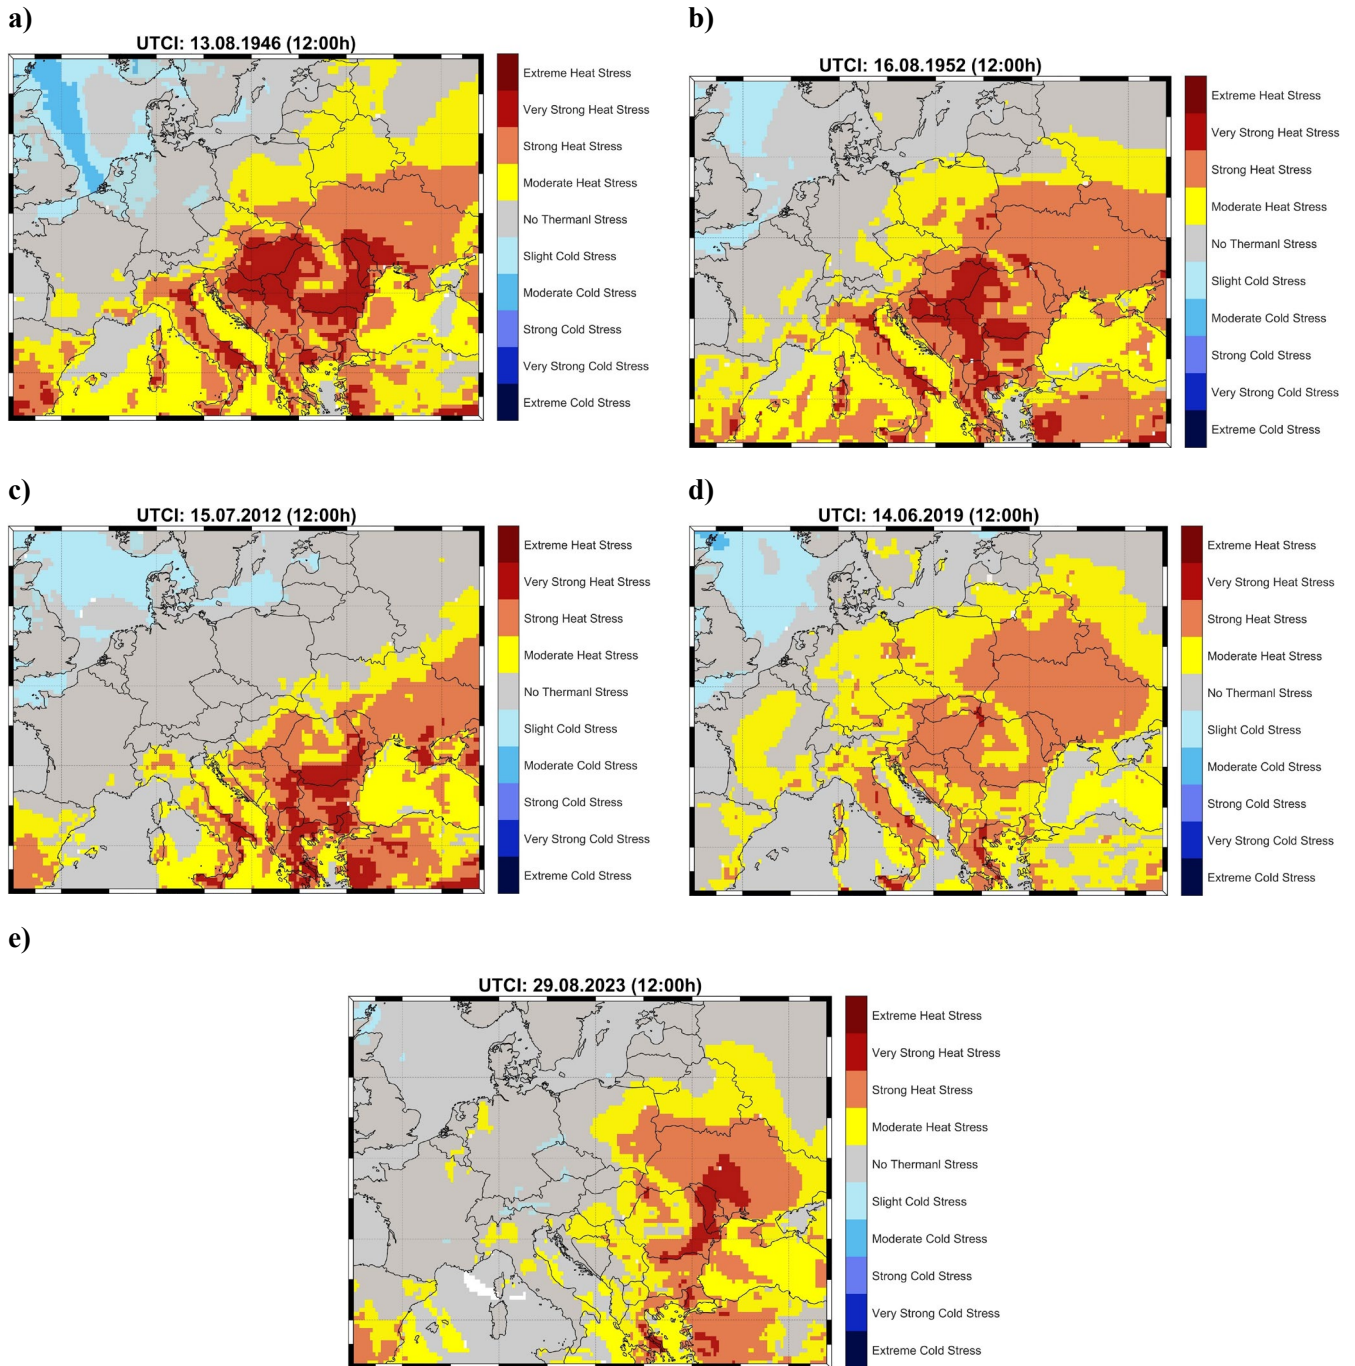

**Figure S5.** The value of the Universal Thermal Climate Index (UTCI) at 12:00 p.m. on the day of the HW, for different HW events: a) August 1946; c) August 1952; c) June/July 2012; d) June 2019 and e) August 2023.



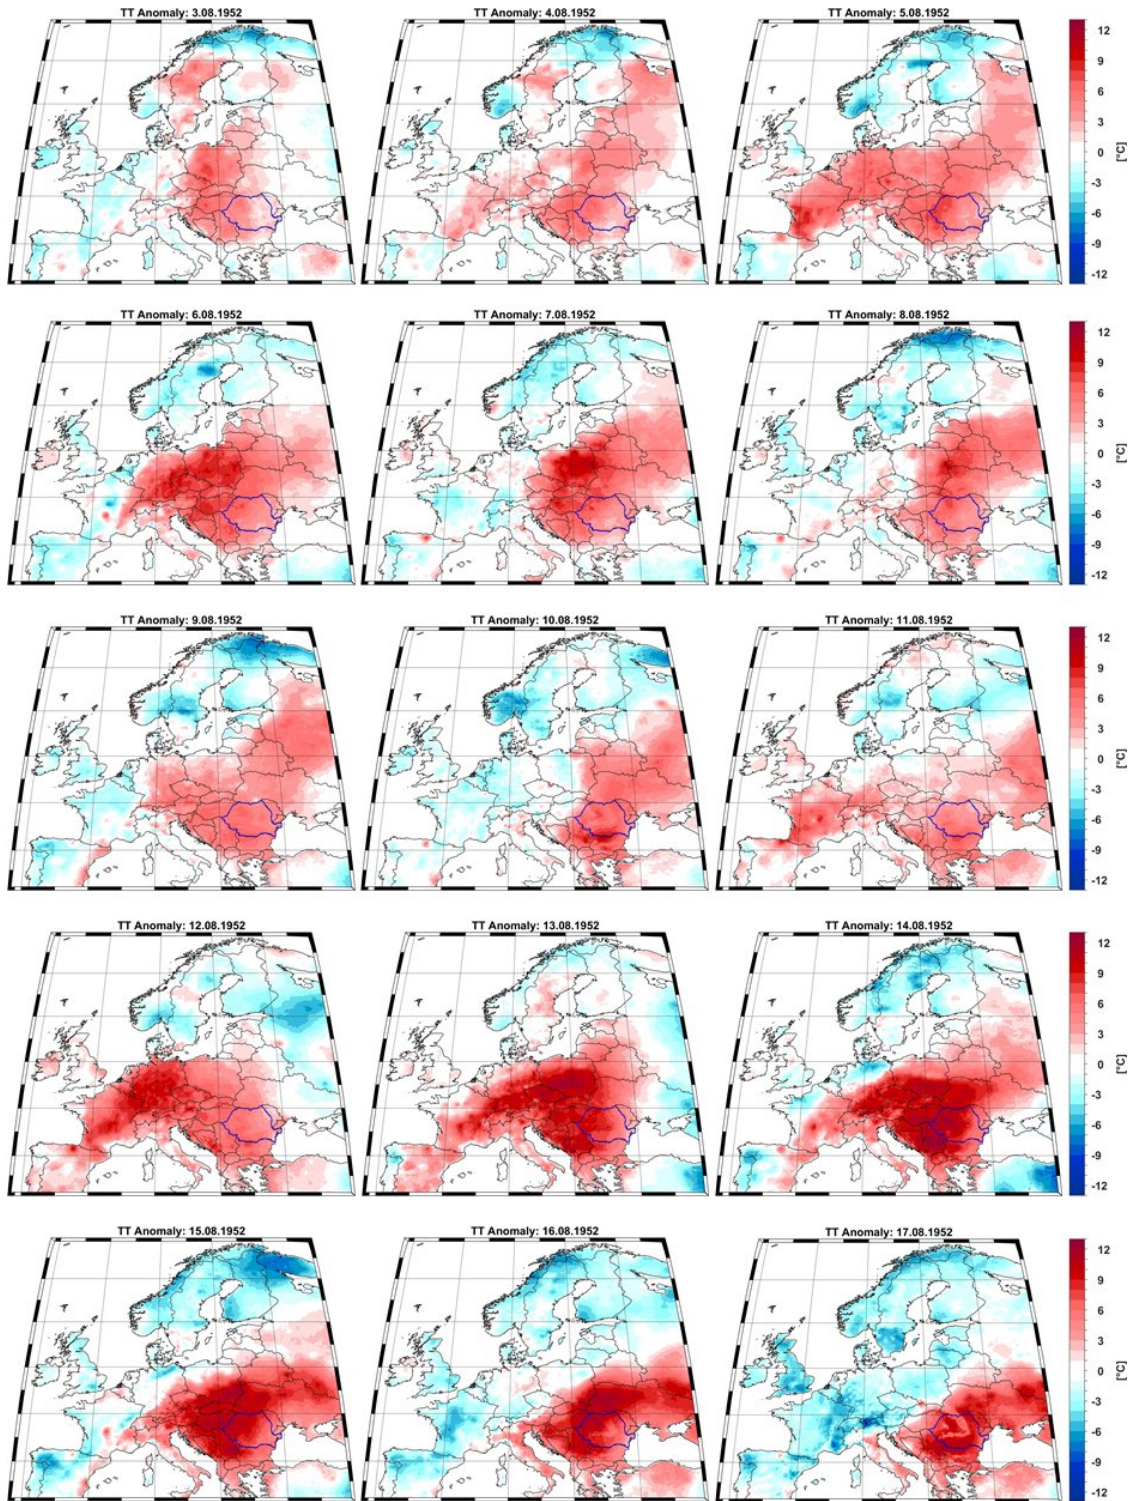

**Figure S6.** Spatial and temporal evolution of the daily maximum temperature anomaly over Europe over the period 3.08.1952 – 17.08.1952. The anomalies are computed relative to the climatological period 1971 – 2000.



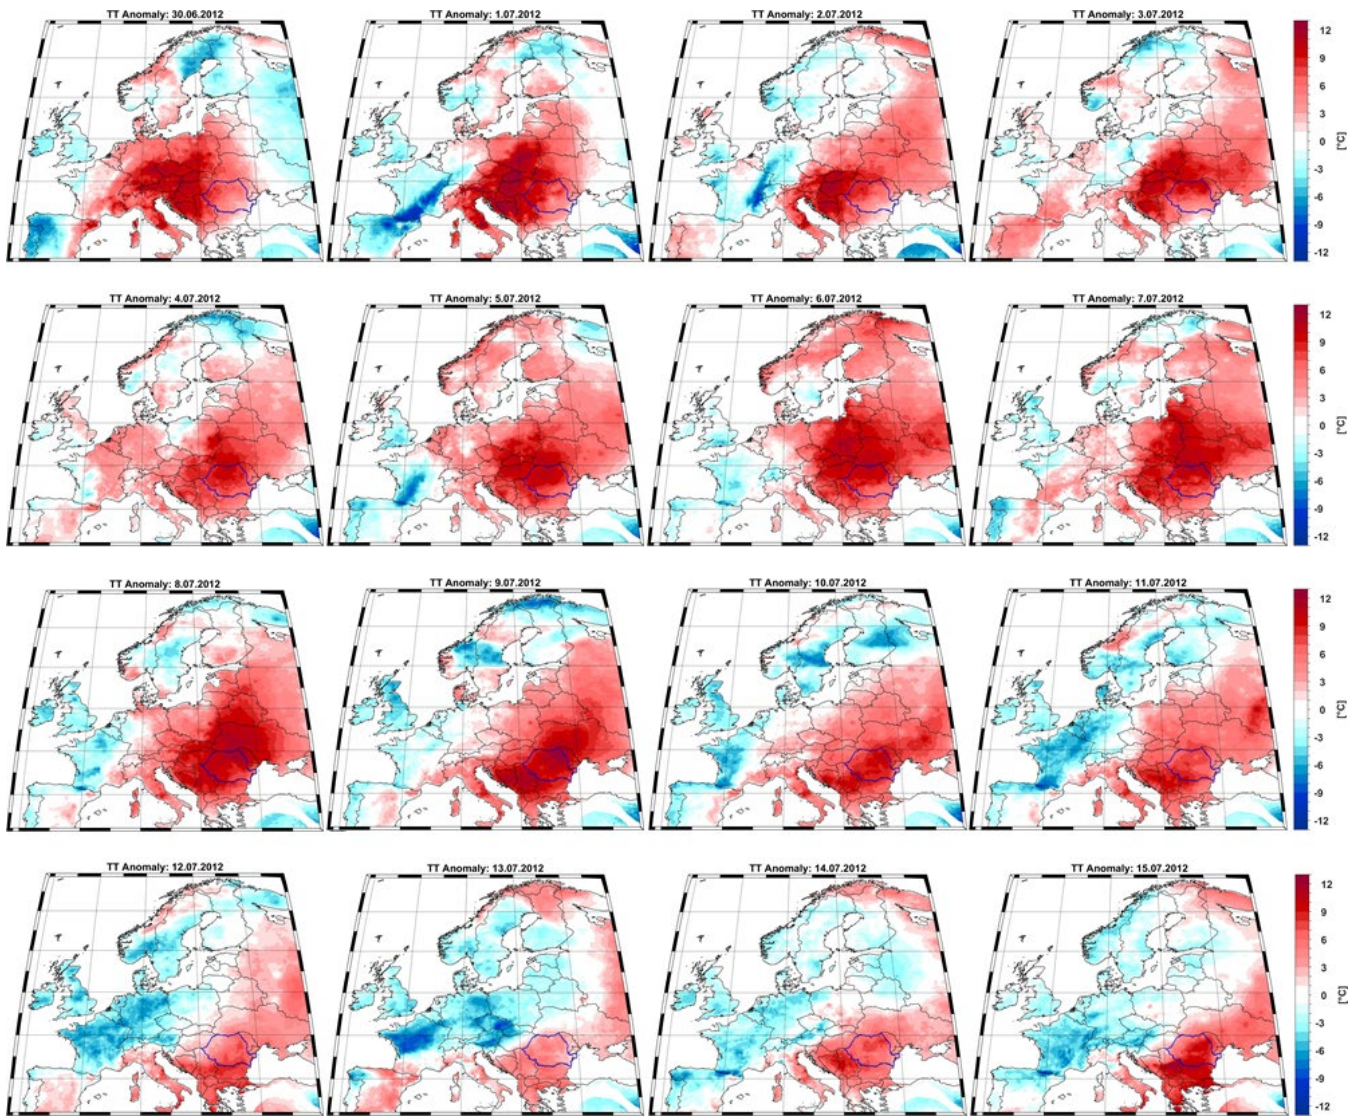

**Figure S7.** Spatial and temporal evolution of the daily maximum temperature anomaly over Europe over the period 30.06.2012 – 15.07.2012. The anomalies are computed relative to the climatological period 1971 – 2000.



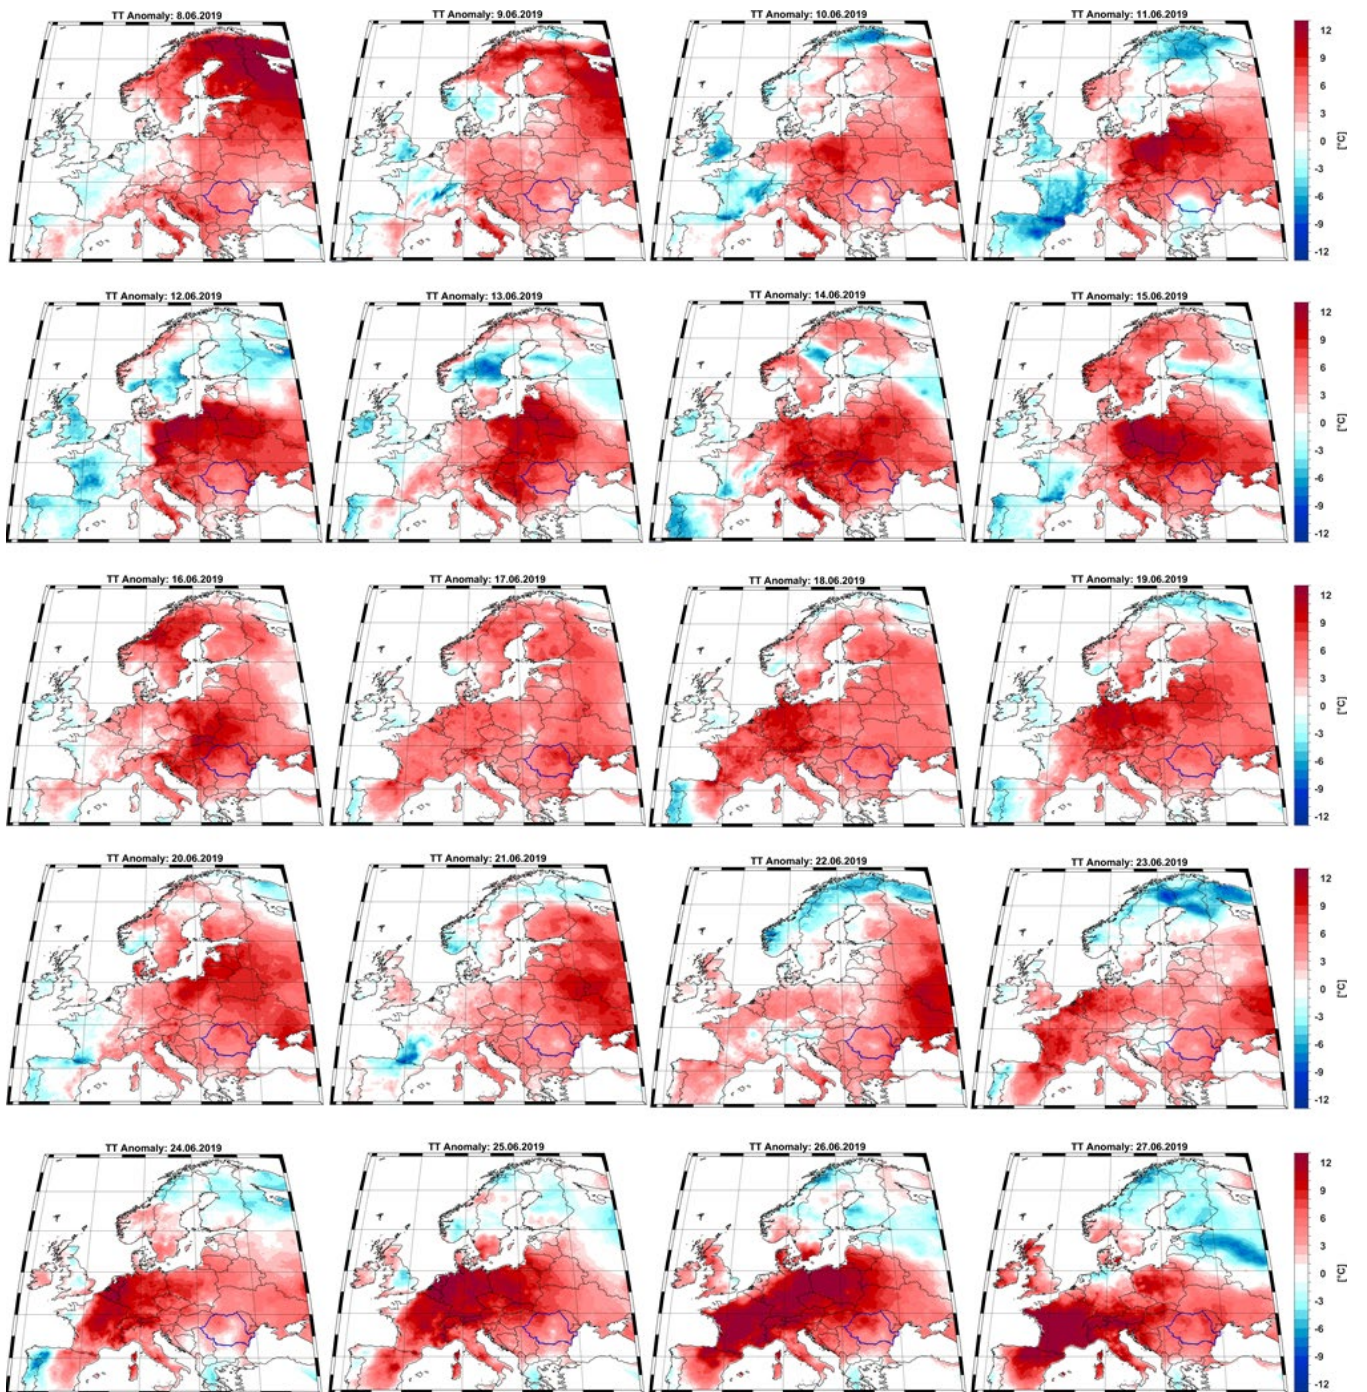

**Figure S8.** Spatial and temporal evolution of the daily maximum temperature anomaly over Europe over the period 12.06.2019 – 27.06.2019. The anomalies are computed relative to the climatological period 1971 – 2000.



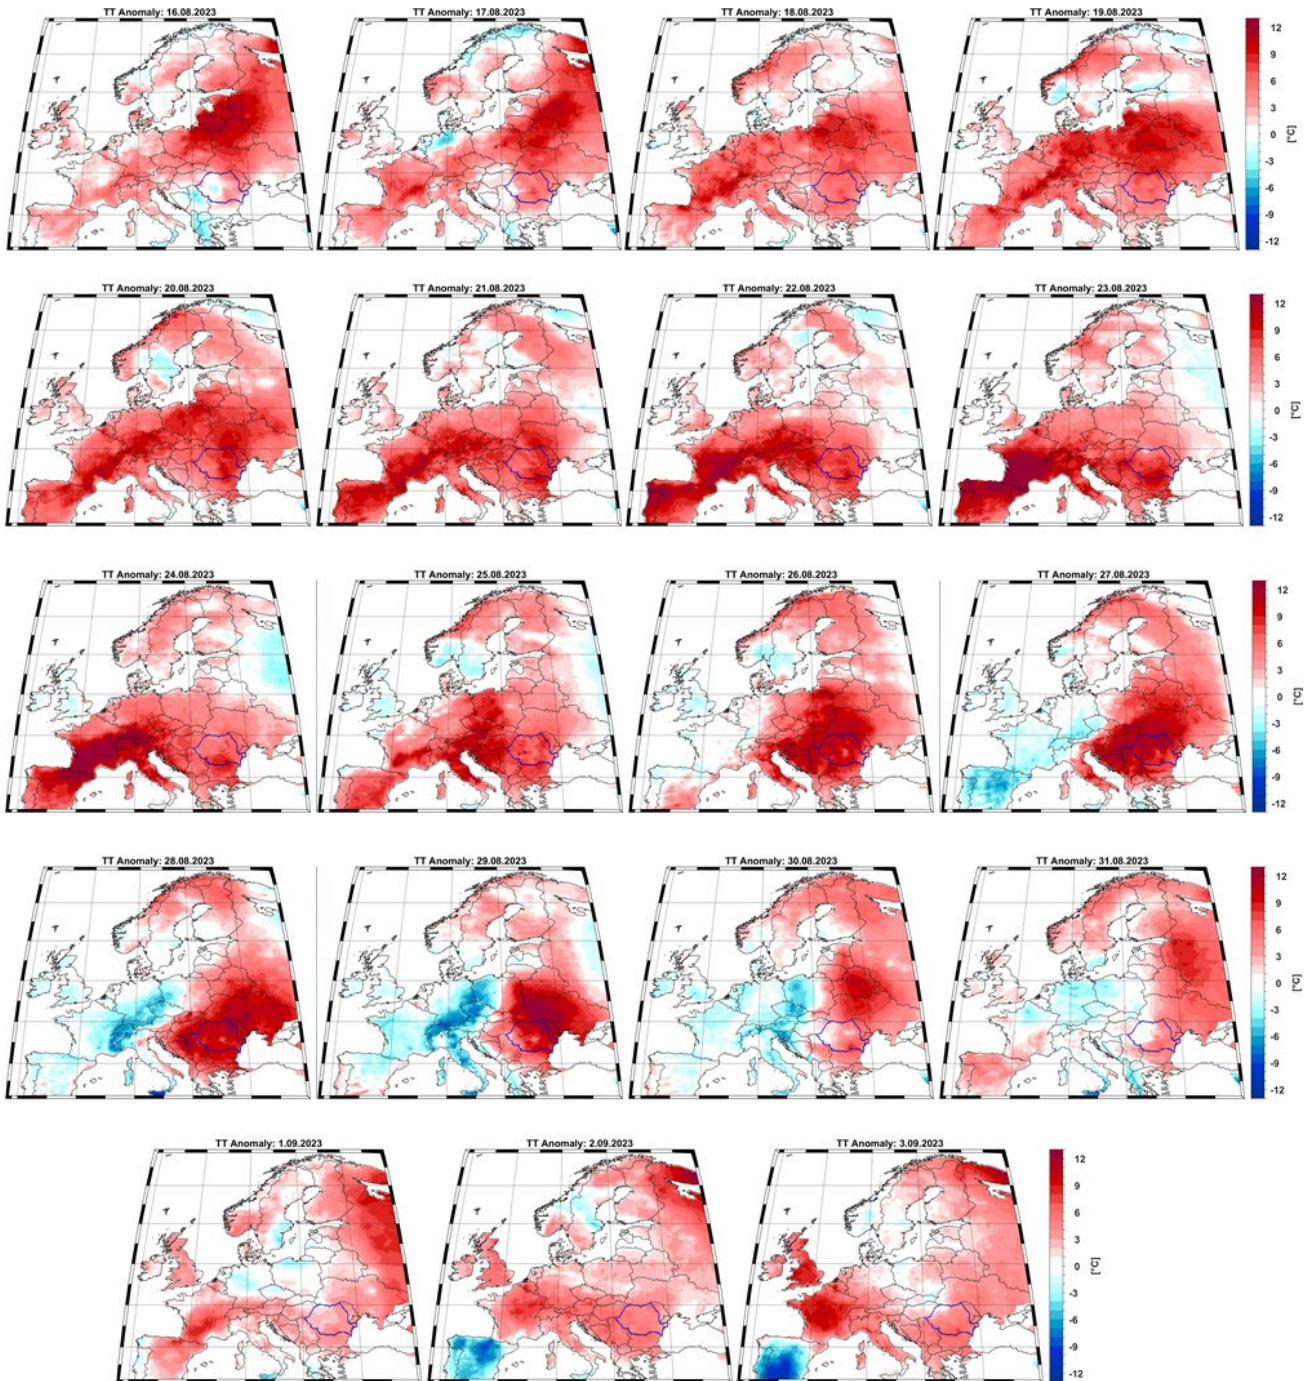

**Figure S9.** Spatial and temporal evolution of the daily maximum temperature anomaly over Europe over the period 16.08.2023 – 3.09.2023. The anomalies are computed relative to the climatological period 1971 – 2000.
